# Supplementary material for: Allelopathic and autotoxic effects of sorghum extract and residues on seed behavior, and morphological, physiological, and biochemical responses of several plants
Source: Research Square preprint supplement (doi:10.21203/rs.3.rs-7318451/v1), 2025-09-09
Supplement: Supplementary file 1 [file d7670e546d1e33c162b04be8.docx]

**Highlights**

- Identifying and selecting plants with the highest tolerance to allelopathic conditions and PEG-induced drought stress
- Evaluating germination indices under adverse conditions
- Evaluating the enzymatic and non-enzymatic responses of different plants under adverse conditions
- Comparative investigation of chemical composition of sorghum extracts, rot residues, and burnt rot residues
